# Supplementary material for: Tamaractam, a New Bioactive Lactam from Tamarix ramosissima, Induces Apoptosis in Rheumatoid Arthritis Fibroblast-Like Synoviocytes
Source: PubMed Central journal article supplement (PMC6155678; doi:10.3390/molecules22010096), 2017-01-10
Supplement: molecules-22-00096-s001.pdf [file molecules-22-00096-s001.pdf]

# Supplementary Materials: Tamaractam, a New Bioactive Lactam from *Tamarix ramosissima* Induces Apoptosis in Rheumatoid Arthritis Fibroblast-Like Synoviocytes

Yao Yao, Cheng-Shuai Jiang, Na Sun, Wei-Qi Li, Yang Niu, Huai-Qin Han, Zhen-Hua Miao, Xun-Xia Zhao, Jing Zhao and Juan Li

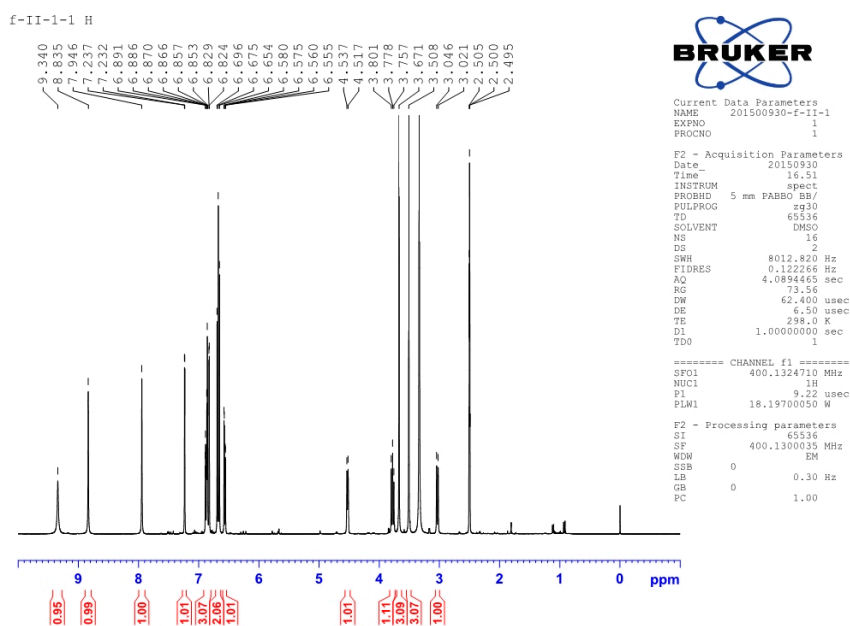

Figure S1. Tamaractam-<sup>1</sup>H.

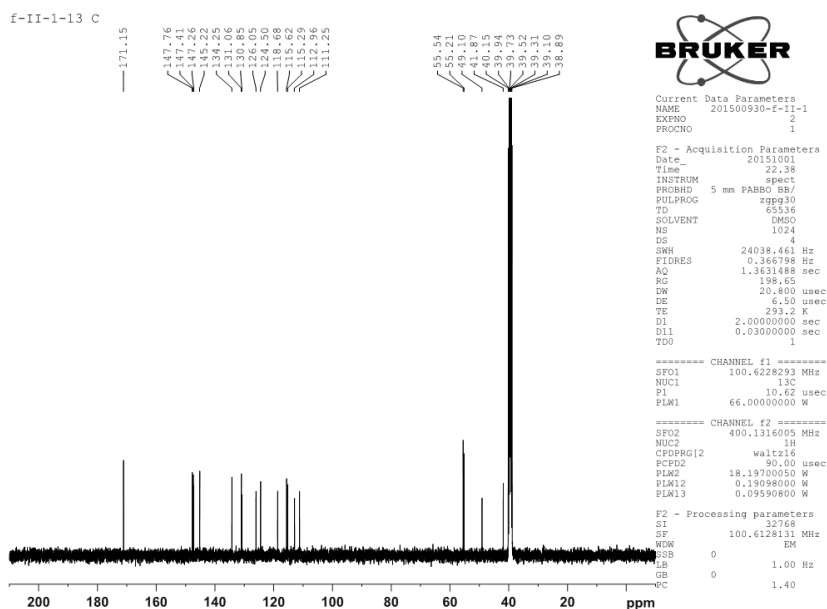

Figure S2. Tamaractam-<sup>13</sup>C.

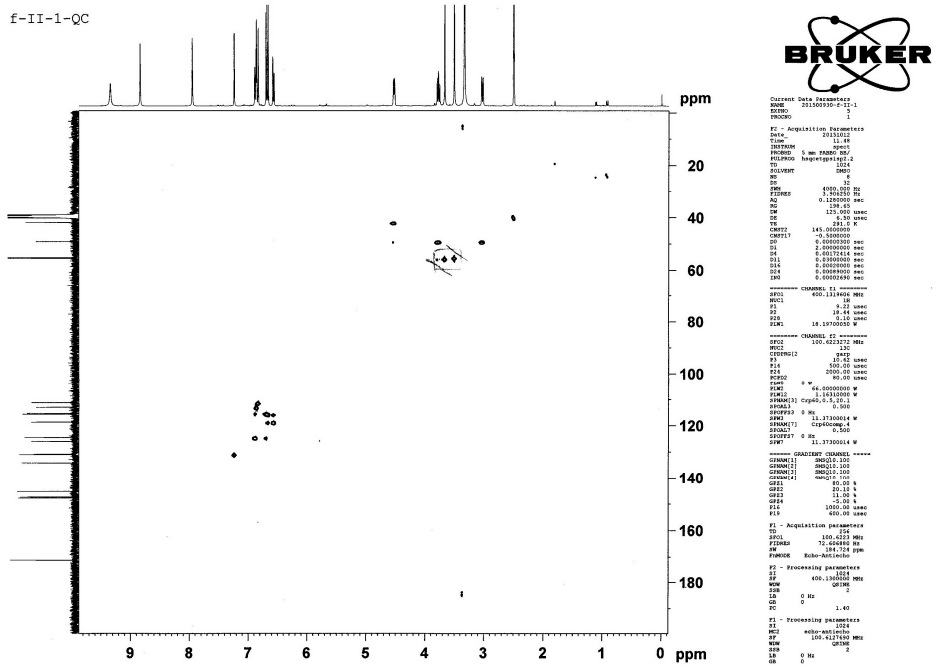

Figure S3. Tamaractam-QC.

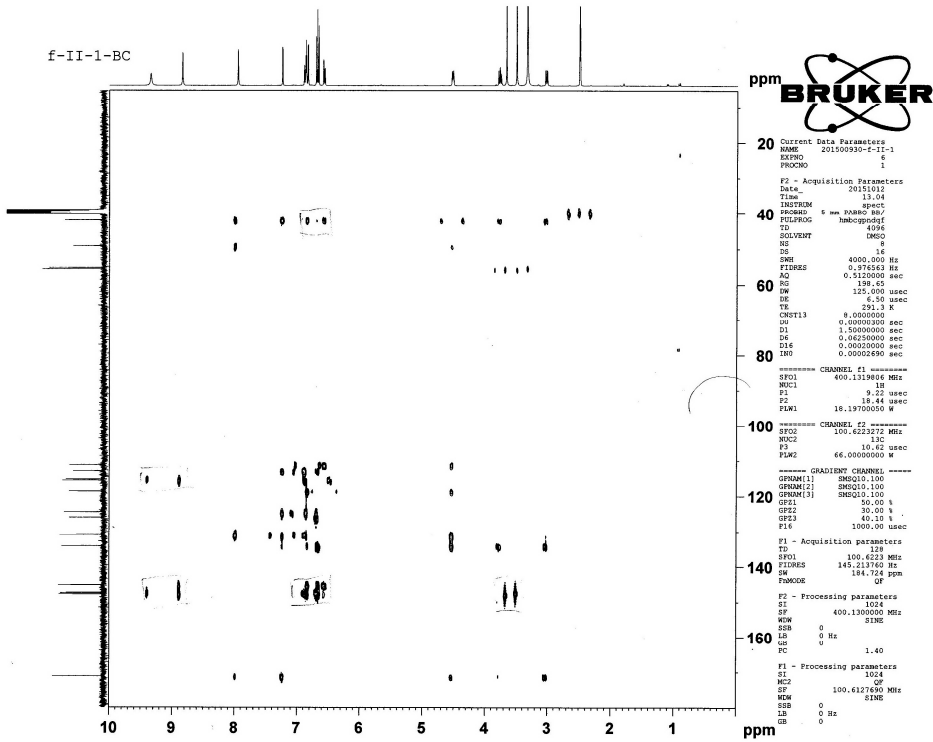

Figure S4. Tamaractam-BC1.

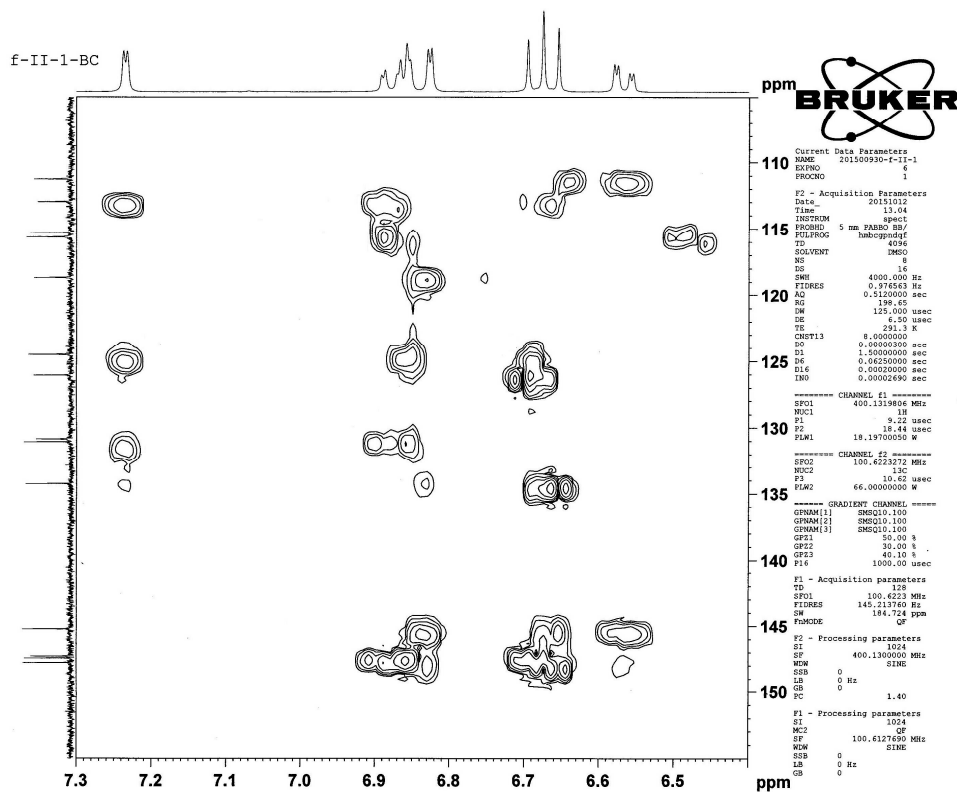

Figure S5. Tamaractam-BC2.

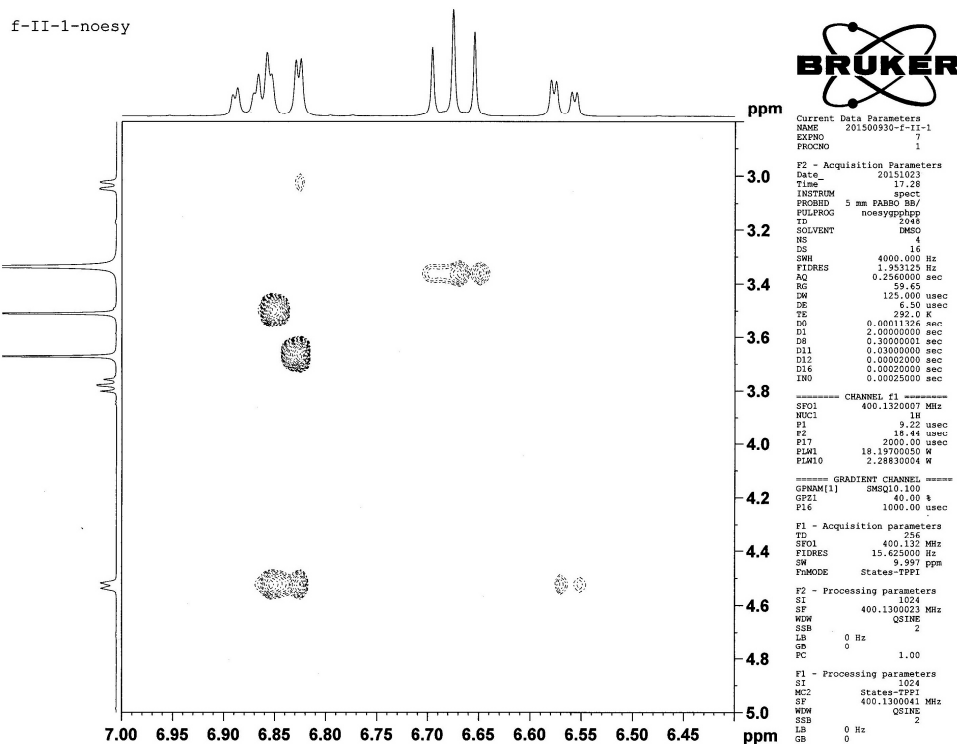

Figure S6. Tamaractam-noesy.
